# Supplementary material for: Complete Genome Sequence Analysis of Kribbella sp. CA-293567 and Identification of the Kribbellichelins A & B and Sandramycin Biosynthetic Gene Clusters
Source: MDPI journal article supplement (doi:10.3390/microorganisms11020265), 2023-01-19
Supplement: s1 [file s1]

# Complete Genome Sequence Analysis of *Kribbella* sp. CA-293567 and Identification of the Kribbellichelins A & B and Sandramycin Biosynthetic Gene Clusters

Marina Sánchez-Hidalgo\*, María Jesús García, Ignacio González, Daniel Oves-Costales, Olga Genilloud

Fundación MEDINA, Avenida del Conocimiento 34, PTS Health Sciences Technology Park, 18016 Granada, Spain

\* Correspondence: marina.sanchez@medinaandalucia.es (M.S-H.), +34958993965

**Table S1.** Publicly available genomes from *Kribbella* strains used in this study. The genome accession codes and number of antiSMASH predicted regions are indicated.

| Strain                                     | GenBank accession | Assembly code | WGS accession     | Assembly Level | Number of contigs | Size      | GC content | Number of antiSMASH predicted regions |
|--------------------------------------------|-------------------|---------------|-------------------|----------------|-------------------|-----------|------------|---------------------------------------|
| <i>Kribbella flavida</i> DSM 17836         | GCA_000024345.1   | ASM2434v1     | CP001736.1        | Complete       | 1                 | 7,579,488 | 70.5       | 12                                    |
| <i>Kribbella catacumbae</i> DSM 19601      | GCA_000372465.1   | ASM37246v1    | AQUZ000000000.1   | Contig         | 152               | 9,627,810 | 67.5       | 17                                    |
| <i>Kribbella</i> sp. AU-6-A                | GCA_001984195.1   | ASM198419v1   | MTQN000000000.1   | Contig         | 12                | 8,101,914 | 69.5       | 12                                    |
| <i>Kribbella monticola</i> NEAU-SW521      | GCA_003261635.1   | ASM326163v1   | QFXK000000000.1   | Contig         | 92                | 8,028,932 | 67.8       | 12                                    |
| <i>Kribbella</i> sp. VKM Ac-2569           | GCA_004216905.1   | ASM421690v1   | SGXJ000000000.1   | Contig         | 13                | 8,427,108 | 68         | 7                                     |
| <i>Kribbella soli</i> VKM Ac-2540          | GCA_004217145.1   | ASM421714v1   | SHKR000000000.1   | Contig         | 22                | 8,637,800 | 67.5       | 9                                     |
| <i>Kribbella speibonae</i> SK5             | GCA_004331335.1   | ASM433133v1   | SIJY000000000.1   | Contig         | 21                | 8,874,969 | 68.6       | 9                                     |
| <i>Kribbella soli</i> KCTC 29219           | GCA_004331345.1   | ASM433134v1   | SIJZ000000000.1   | Contig         | 10                | 8,785,001 | 68         | 9                                     |
| <i>Kribbella speibonae</i> YM55            | GCA_004331375.1   | ASM433137v1   | SJKC000000000.1   | Contig         | 17                | 9,285,392 | 68.6       | 9                                     |
| <i>Kribbella sindirgiensis</i> DSM 27082   | GCA_004331435.1   | ASM433143v1   | SJKA000000000.1   | Contig         | 54                | 8,891,727 | 68.5       | 8                                     |
| <i>Kribbella pittospori</i> NRRL B-24813   | GCA_004331465.1   | ASM433146v1   | SJKB000000000.1   | Contig         | 70                | 9,491,812 | 68.1       | 12                                    |
| <i>Kribbella capetownensis</i> YM53        | GCA_004331485.1   | ASM433148v1   | SJKD000000000.1   | Contig         | 31                | 8,831,527 | 68         | 9                                     |
| <i>Kribbella</i> sp. VKM Ac-2500           | GCA_004340265.1   | ASM434026v1   | SLVW000000000.1   | Contig         | 82                | 9,277,683 | 68         | 9                                     |
| <i>Kribbella</i> sp. VKM Ac-2572           | GCA_004342025.1   | ASM434202v1   | SLWN000000000.1   | Contig         | 45                | 9,146,758 | 68         | 10                                    |
| <i>Kribbella</i> sp. VKM Ac-2538           | GCA_004342085.1   | ASM434208v1   | SLWM000000000.1   | Contig         | 73                | 9,192,871 | 68         | 8                                     |
| <i>Kribbella</i> sp. VKM Ac-2568           | GCA_004345365.1   | ASM434536v1   | SLVF000000000.1   | Contig         | 41                | 8,875,416 | 68         | 10                                    |
| <i>Kribbella</i> sp. VKM Ac-2541           | GCA_004345665.1   | ASM434566v1   | SLWR000000000.1   | Contig         | 33                | 8,102,898 | 67.5       | 13                                    |
| <i>Kribbella albertanoniae</i> JCM 30547   | GCA_004348455.1   | ASM434845v1   | SMKA000000000.1   | Contig         | 593               | 9,727,339 | 67.4       | 25                                    |
| <i>Kribbella turkmenica</i> 16K104         | GCA_004348725.1   | ASM434872v1   | SMKR000000000.1   | Contig         | 351               | 7,447,142 | 69.4       | 10                                    |
| <i>Kribbella antibiotica</i> JCM 13523     | GCA_004349055.1   | ASM434905v1   | SMKX000000000.1   | Contig         | 348               | 9,279,240 | 67         | 33                                    |
| <i>Kribbella</i> sp. VKM Ac-2527           | GCA_004361855.1   | ASM436185v1   | SNWQ000000000.1   | Contig         | 98                | 9,457,695 | 67.5       | 12                                    |
| <i>Kribbella</i> sp. VKM Ac-2571           | GCA_004362255.1   | ASM436225v1   | SNWS000000000.1   | Contig         | 50                | 8,494,871 | 68         | 8                                     |
| <i>Kribbella</i> sp. VKM Ac-2575           | GCA_004365175.1   | ASM436517v1   | SOCE000000000.1   | Contig         | 9                 | 8,032,448 | 68         | 13                                    |
| <i>Kribbella</i> sp. VKM Ac-2573           | GCA_004365355.1   | ASM436535v1   | SODP000000000.1   | Contig         | 15                | 8,365,383 | 68         | 8                                     |
| <i>Kribbella</i> sp. VKM Ac-2570           | GCA_004365875.1   | ASM436587v1   | SODF000000000.1   | Contig         | 12                | 8,322,687 | 67.5       | 9                                     |
| <i>Kribbella</i> sp. VKM Ac-2566           | GCA_004366005.1   | ASM436600v1   | SODT000000000.1   | Contig         | 25                | 8,670,423 | 68         | 8                                     |
| <i>Kribbella</i> sp. VKMAc-2574            | GCA_004366075.1   | ASM436607v1   | SODU000000000.1   | Contig         | 14                | 8,387,673 | 68         | 7                                     |
| <i>Kribbella jiaozeonensis</i> NEAU-THZ27  | GCA_005233875.1   | ASM523387v1   | SZPZ000000000.1   | Contig         | 12                | 8,659,701 | 68         | 10                                    |
| <i>Kribbella jejuensis</i> DSM 17305       | GCA_006715085.1   | ASM671508v1   | VFMM000000000.1   | Contig         | 4                 | 7,505,702 | 68.5       | 9                                     |
| <i>Kribbella amoyensis</i> DSM 24683       | GCA_007828865.1   | ASM782886v1   | VIVK000000000.1   | Contig         | 8                 | 8,120,218 | 70         | 9                                     |
| <i>Kribbella shirazensis</i> DSM 45490     | GCA_011761605.1   | ASM1176160v1  | JAASRO010000001.1 | Contig         | 1                 | 8,596,726 | 69         | 7                                     |
| <i>Kribbella sandramycini</i> ATCC 39419   | GCA_013131805.1   | ASM1313180v1  | JABJRC000000000.1 | Contig         | 34                | 8,105,579 | 69.1       | 19                                    |
| <i>Kribbella italica</i> DSM 28967         | GCA_014205135.1   | ASM1420513v1  | JACHMY000000000.1 | Contig         | 1                 | 8,885,108 | 69.5       | 14                                    |
| <i>Kribbella solani</i> DSM 17294          | GCA_014205295.1   | ASM1420529v1  | JACHNF000000000.1 | Contig         | 2                 | 7,851,691 | 68         | 11                                    |
| <i>Kribbella sandramycini</i> DSM 15626    | GCA_014207795.1   | ASM1420779v1  | JACHKF010000001.1 | Contig         | 1                 | 8,120,153 | 69         | 20                                    |
| <i>Kribbella qitaiheensis</i> SPB151       | GCA_014217565.1   | ASM1421756v1  | CP043661.1        | Complete       | 1                 | 8,156,807 | 67         | 12                                    |
| <i>Kribbella aluminosa</i> DSM 18824       | GCA_017876295.1   | ASM1787629v1  | JAGINT000000000.1 | Contig         | 2                 | 8,936,317 | 68.5       | 11                                    |
| <i>Kribbella</i> sp. b6_HoplandSoilSeptJan | GCA_021154635.1   | ASM2115463v1  | JAJKIE000000000.1 | Contig         | 425               | 4,085,102 | 68         | 4                                     |
| <i>Kribbella</i> sp. CA-293567             |                   |               |                   | Complete       | 1                 | 7,611,196 | 68.6       | 19                                    |

**Table S2.** *Kribbella* sp. CA-293567 genome statistics.

| Characteristic                 | Value     | % of Total |
|--------------------------------|-----------|------------|
| Genome size (bp)               | 7,611,196 |            |
| DNA G+C content (bp)           |           | 68.6       |
| Number of replicons            | 1         |            |
| Extrachromosomal elements      | 0         |            |
| Total genes                    | 7,057     | 100        |
| Protein-coding genes           | 6982      | 98.93      |
| Genes with function prediction | 3197      | 45.3       |

**Table S3.** ORFs present in the kribbellichelins A-B BGC.

| ORF          | Length of encoded protein (AA) | Closest BLAST homolog<br>[Strain] Ref                                                                          | Identity (%) | Similarity (%) |
|--------------|--------------------------------|----------------------------------------------------------------------------------------------------------------|--------------|----------------|
| <i>krb1</i>  | 352                            | Hypothetical protein<br>[ <i>Kribbella catacumbae</i> ] WP_020384918.1                                         | 71           | 79             |
| <i>krb2</i>  | 275                            | Undecaprenyl-diphosphate phosphatase<br>[ <i>Streptomyces</i> sp. SID13031] WP_164593903.1                     | 95           | 98             |
| <i>krb3</i>  | 356                            | LLM class F420-dependent oxidoreductase<br>[ <i>Kribbella catacumbae</i> ] WP_026162457.1                      | 95           | 97             |
| <i>krb4</i>  | 313                            | Aldo/keto reductase<br>[ <i>Kribbella</i> sp. VKM Ac-2568] WP_132297909.1                                      | 99           | 100            |
| <i>krb5</i>  | 61                             | DUF5703 family protein<br>[ <i>Kribbella qitaiheensis</i> ] WP_185445878.1                                     | 100          | 100            |
| <i>krb6</i>  | 405                            | Major facilitator superfamily MFS_1<br>[ <i>Kribbella flavida</i> DSM 17836] ADB32869.1                        | 76           | 85             |
| <i>krb7</i>  | 295                            | LysR family transcriptional regulator<br>[ <i>Kribbella</i> sp. VKM Ac-2568] WP_132297890.1                    | 83           | 89             |
| <i>krb8</i>  | 252                            | SDR family oxidoreductase<br>[ <i>Acrocarpospora macrocephala</i> ] WP_155361669.1                             | 69           | 82             |
| <i>krb9</i>  | 443                            | M20/M25/M40 family metallo-hydrolase<br>[ <i>Streptomyces</i> sp. SID13031] WP_164593881.1                     | 95           | 97             |
| <i>krb10</i> | 1051                           | S8 family serine peptidase<br>[ <i>Streptomyces</i> sp. SID13031] WP_164593874.1                               | 93           | 96             |
| <i>krb11</i> | 260                            | Hypothetical protein<br>[ <i>Amycolatopsis keratiniphila</i> ] WP_043848172.1                                  | 52           | 63             |
| <i>krb12</i> | 133                            | Hypothetical protein<br>[ <i>Amycolatopsis alba</i> ] WP_020634912.1                                           | 60           | 76             |
| <i>krb13</i> | 263                            | Class I SAM-dependent methyltransferase<br>[ <i>Kribbella</i> sp. VKM Ac-2575] WP_133979490.1                  | 92           | 94             |
| <i>krb14</i> | 417                            | ABC transporter substrate-binding protein<br>[ <i>Kribbella speibonae</i> ] WP_131462990.1                     | 83           | 91             |
| <i>krb15</i> | 348                            | Iron chelate uptake ABC transporter family permease subunit<br>[ <i>Kribbella antibiotica</i> ] WP_132168665.1 | 93           | 97             |
| <i>krb16</i> | 369                            | Iron chelate uptake ABC transporter family permease subunit<br>[ <i>Kribbella speibonae</i> ] WP_202875736.1   | 90           | 93             |
| <i>krb17</i> | 294                            | ABC transporter ATP-binding protein<br>[ <i>Streptomyces</i> sp. SID13031] WP_164596070.1                      | 95           | 97             |
| <i>krb18</i> | 2463                           | Non-ribosomal peptide synthetase<br>[ <i>Streptomyces</i> sp. SID13031] WP_164596008.1                         | 84           | 89             |
| <i>krb19</i> | 616                            | Siderophore-interacting protein<br>[ <i>Streptomyces</i> sp. SID13031] NEA32353.1                              | 88           | 93             |
| <i>krb20</i> | 83                             | Phosphopantetheine-binding protein<br>[ <i>Streptomyces</i> sp. SID13031] WP_164596006.1                       | 93           | 96             |
| <i>krb21</i> | 285                            | Class I SAM-dependent methyltransferase<br>[ <i>Streptomyces</i> sp. SID13031] WP_164596005.1                  | 95           | 97             |
| <i>krb22</i> | 581                            | ABC transporter ATP-binding protein<br>[ <i>Streptomyces</i> sp. SID13031] NEA32350.1                          | 92           | 95             |
| <i>krb23</i> | 556                            | ABC transporter ATP-binding protein/permease<br>[ <i>Kribbella italica</i> ] WP_202893055.1                    | 90           | 93             |
| <i>krb24</i> | 3107                           | Amino acid adenylation domain-containing protein<br>[ <i>Streptomyces</i> sp. SID13031] WP_239062464.1         | 85           | 90             |
| <i>krb25</i> | 406                            | FAD-dependent monooxygenase<br>[ <i>Streptomyces</i> sp. SID13031] WP_164596002.1                              | 92           | 96             |
| <i>krb26</i> | 541                            | AMP-binding protein<br>[ <i>Kribbella albertanoniae</i> ] WP_132402990.1                                       | 96           | 98             |
| <i>krb27</i> | 232                            | 4'-phosphopantetheinyl transferase superfamily protein<br>[ <i>Streptomyces</i> sp. SID13031] WP_164596000.1   | 89           | 92             |
| <i>krb28</i> | 273                            | Alpha/beta hydrolase<br>[ <i>Kribbella albertanoniae</i> ] WP_132402993.1                                      | 89           | 92             |
| <i>krb29</i> | 248                            | 4-hydroxy-tetrahydroadipicinate reductase<br>[ <i>Streptomyces</i> sp. SID13031] WP_164595998.1                | 90           | 95             |
| <i>krb30</i> | 137                            | Aspartate 1-decarboxylase<br>[ <i>Streptomyces</i> sp. SID13031] WP_164595997.1                                | 97           | 99             |
| <i>krb31</i> | 80                             | MbtH family NRPS accessory protein<br>[ <i>Kribbella albertanoniae</i> ] WP_132403002.1                        | 97           | 98             |
| <i>krb32</i> | 490                            | FAD-dependent tricarballoylate dehydrogenase TcuA<br>[ <i>Kribbella albertanoniae</i> ] WP_132403005.1         | 94           | 96             |
| <i>krb33</i> | 546                            | Alpha/beta hydrolase<br>[ <i>Kribbella flavida</i> ] WP_041289211.1                                            | 88           | 93             |
| <i>krb34</i> | 242                            | MerR family transcriptional regulator<br>[ <i>Kribbella albertanoniae</i> ] WP_132405175.1                     | 83           | 89             |
| <i>krb35</i> | 156                            | Nuclear transport factor 2 family protein<br>[ <i>Streptomyces phaeochromogenes</i> ] WP_055611607.1           | 78           | 88             |
| <i>krb36</i> | 206                            | TetR/AcrR family transcriptional regulator<br>[ <i>Kibdelosporangium persicum</i> ] WP_173131860.1             | 78           | 88             |
| <i>krb37</i> | 400                            | Pimeloyl-ACP methyl ester carboxylesterase<br>[ <i>Kribbella</i> sp. VKM Ac-2571] TDO68387.1                   | 91           | 95             |
| <i>krb38</i> | 431                            | Epoxide hydrolase<br>[ <i>Kribbella</i> sp. VKM Ac-2571] WP_133782690.1                                        | 89           | 93             |
| <i>krb39</i> | 220                            | DUF998 domain-containing protein<br>[ <i>Kribbella turkmenica</i> ] WP_132321484.1                             | 77           | 87             |
| <i>krb40</i> | 112                            | Hypothetical protein<br>[ <i>Kribbella flavida</i> ] WP_012919172.1                                            | 81           | 91             |
| <i>krb41</i> | 181                            | Hypothetical protein<br>[ <i>Kribbella amoyensis</i> ] WP_145806086.1                                          | 72           | 79             |

**Table S4.** ORFs present in the sandramycin BGC from *Kribbella* sp. CA-293567. A comparison with the ORFs present in the *sdm* and *tio* BGCs is shown.

| ORF          | Length of encoded protein (AA) | Closest BLAST homolog [Strain] Ref                                                               | Identity (%) | Similarity (%) | <i>K. sandramycini</i> homologous gene | Identity (%) | Similarity (%) | Thiocoralline homologous gene | Identity (%) | Similarity (%) |
|--------------|--------------------------------|--------------------------------------------------------------------------------------------------|--------------|----------------|----------------------------------------|--------------|----------------|-------------------------------|--------------|----------------|
| <i>san1</i>  | 144                            | VOC family protein<br>[ <i>Kribbella qitaiheensis</i> ] WP_185445859.1                           | 81           | 92             | <i>sdm1</i>                            | 73.4         | 81.1           | <i>tioX</i>                   | 56.7         | 70.1           |
| <i>san2</i>  | 355                            | Ornithine cyclodeaminase family protein<br>[ <i>Kribbella qitaiheensis</i> ] WP_185445860.1      | 90           | 94             | <i>sdm2</i>                            | 84.6         | 92.4           |                               |              |                |
| <i>san3</i>  | 526                            | AMP-binding protein<br>[ <i>Kribbella qitaiheensis</i> ] WP_185445861.1                          | 84           | 91             | <i>sdm3</i>                            | 83.7         | 89.5           | <i>tioJ</i>                   | 63.5         | 78.2           |
| <i>san4</i>  | 582                            | Non-ribosomal peptide synthetase<br>[ <i>Kribbella qitaiheensis</i> ] WP_185445862.1             | 83           | 90             | <i>sdm4</i>                            | 81.3         | 88             | <i>tioK</i>                   | 61.5         | 74.4           |
| <i>san5</i>  | 398                            | Cytochrome P450<br>[ <i>Amycolatopsis</i> sp. MtRt-6] WP_206792488.1                             | 88           | 94             | <i>sdm5</i>                            | 85.7         | 91.7           | <i>tioI</i>                   | 65.2         | 77.4           |
| <i>san6</i>  | 257                            | Thioesterase<br>[ <i>Kribbella qitaiheensis</i> ] QNE17028.1                                     | 77           | 86             | <i>sdm6</i>                            | 74.7         | 79.4           | <i>tioQ</i>                   | 48.6         | 62.4           |
| <i>san7</i>  | 248                            | NAD(P)-dependent dehydrogenase<br>[ <i>Kribbella sandramycini</i> ] MBB6569689.1                 | 78           | 89             | <i>sdm7</i>                            | 78           | 89             | <i>tioH</i>                   | 58.7         | 71.6           |
| <i>san8</i>  | 409                            | Pyridoxal phosphate-dependent aminotransferase<br>[ <i>Amycolatopsis bullii</i> ] WP_191307014.1 | 87           | 92             | <i>sdm8</i>                            | 86.6         | 91.4           | <i>tioG</i>                   | 61.8         | 74.5           |
| <i>san9</i>  | 239                            | Tryptophan 2,3-dioxygenase family protein<br>[ <i>Kribbella qitaiheensis</i> ] WP_185445866.1    | 87           | 93             | <i>sdm9</i>                            | 86.4         | 95             | <i>tioF</i>                   | 58.8         | 71.6           |
| <i>san10</i> | 168                            | DNA-binding response OmpR family regulator<br>[ <i>Kribbella sandramycini</i> ] MBB6569686.1     | 90           | 94             | <i>sdm10</i>                           | 90           | 94             |                               |              |                |
| <i>san11</i> | 3635                           | Amino acid adenylation domain-containing protein<br>[ <i>Kribbella qitaiheensis</i> ] QNE17032.1 | 76           | 85             | <i>sdm11</i>                           | 74.7         | 83.8           |                               |              |                |
| <i>san12</i> | 3090                           | Non-ribosomal peptide synthetase<br>[ <i>Kribbella qitaiheensis</i> ] WP_185445868.1             | 77           | 85             | <i>sdm12</i>                           | 73.1         | 82.9           |                               |              |                |
| <i>san13</i> | 73                             | Mbth family NRPS accessory protein<br>[ <i>Amycolatopsis</i> sp. MtRt-6] WP_206792493.1          | 85           | 91             | <i>sdm13</i>                           | 68.5         | 82.2           | <i>tioT</i>                   | 70.4         | 84.5           |
| <i>san14</i> | 145                            | Hypothetical protein<br>[ <i>Rhodococcus marinonascens</i> ] WP_245813747.1                      | 65           | 76             | <i>sdm14</i>                           | 65.8         | 76             |                               |              |                |
| <i>san15</i> | 233                            | TetR family transcriptional regulator<br>[ <i>Streptomyces</i> sp. SID13031] WP_164593841.1      | 83           | 88             | -                                      | -            | -              |                               |              |                |
| <i>san16</i> | 321                            | ABC transporter ATP-binding protein<br>[ <i>Kribbella qitaiheensis</i> ] WP_185445870.1          | 87           | 92             | <i>sdm15</i>                           | 78.3         | 88.2           |                               |              |                |
| <i>san17</i> | 283                            | ABC transporter permease<br>[ <i>Kribbella qitaiheensis</i> ] WP_185445871.1                     | 83           | 88             | <i>sdm16</i>                           | 79.7         | 88.6           |                               |              |                |
| <i>san18</i> | 228                            | HNH endonuclease family protein<br>[ <i>Streptomyces</i> sp. SID13031] WP_164593685.1            | 90           | 94             | <i>sdm17</i>                           | 71.5         | 78.5           |                               |              |                |
| <i>san19</i> | 475                            | Aminopeptidase P family protein<br>[ <i>Kribbella catacumbae</i> ] WP_020390480.1                | 81           | 86             | -                                      | -            | -              |                               |              |                |
